# Supplementary material
Source: Springer Nature journal article supplement (https://www.springermedizin.de/resource/supplementary/40001_2013_98_MOESM7_ESM.pdf/9685256)

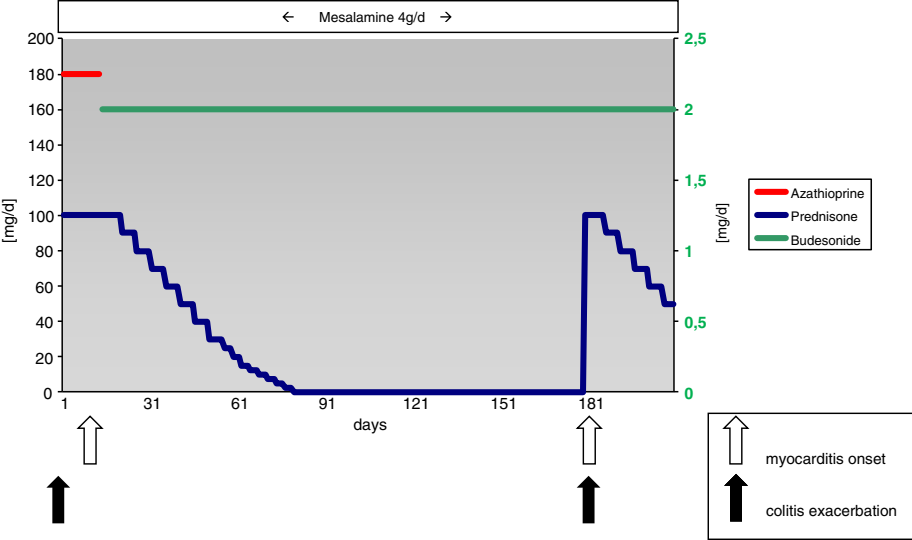

Supplement: MOESM7 [file 9685256]
